# Supplementary material for: Inverse electron-demand 1,3-dipolar cycloaddition of nitrile oxide with common nitriles leading to 3-functionalized 1,2,4-oxadiazoles
Source: Royal Society of Chemistry journal article supplement (doi:10.1039/c1ob05682d), 2011-01-01

# Inverse electron-demand 1,3-dipolar cycloaddition of nitrile oxide with common nitriles leading to 3-functionalized 1,2,4-oxadiazoles

Nagatoshi Nishiwaki,<sup>\*a</sup> Kazuya Kobiro,<sup>a</sup> Shotaro Hirao,<sup>a</sup> Jun Sawayama,<sup>a</sup> Kazuhiko Saigo,<sup>a</sup> Yumiko Ise,<sup>b</sup> Yoshikazu Okajima<sup>b</sup> and Masahiro Ariga<sup>b</sup>

<sup>a</sup> School of Environmental Science and Engineering, Kochi University of Technology, Tosayamada Kami, Kochi 782-8502, Japan. Fax: +81 887 57 2520; Tel: +81 887 57 2517;

E-mail: nishiwaki.nagatoshi@kochi-tech.ac.jp

<sup>b</sup> Department of Chemistry, Osaka Kyoiku University, Asahigaoka, Kashiwara, Osaka 582-8582, Japan.

## Contents

**ESI-2** Preparation of Nitroisoxazolone **2**

**ESI-3** 3-(*N*-Methylcarbamoyl)-5-phenyl-1,2,4-oxadiazole (**3e**) <sup>1</sup>H and <sup>13</sup>C NMR

**ESI-4** 5-(4-Methoxyphenyl)-3-(*N*-methylcarbamoyl)-1,2,4-oxadiazole (**3g**) <sup>1</sup>H and <sup>13</sup>C NMR

**ESI-5** 5-(4-Chlorophenyl)-3-(*N*-methylcarbamoyl)-1,2,4-oxadiazole (**3i**) <sup>1</sup>H and <sup>13</sup>C NMR

**ESI-6** 3-(*N*-Methylcarbamoyl)-5-(3-pyridyl)-1,2,4-oxadiazole (**3j**) <sup>1</sup>H and <sup>13</sup>C NMR

**ESI-7** 3-(*N*-Methylcarbamoyl)-5-(4-pyridyl)-1,2,4-oxadiazole (**3k**) <sup>1</sup>H and <sup>13</sup>C NMR

## Preparation of Nitroisoxazolone **2**

Nitroisoxazolone **2** was easily prepared from commercially available ethyl nitroacetate by three steps with simple experimental manipulations; 1) condensation of nitroacetate with orthoformate, 2) condensation with hydroxylamine, and 3) *N*-methylation with dimethyl sulfate.

### 1) Condensation of nitroacetate with orthoformate<sup>1</sup>

To a solution of ethyl nitroacetate (40 mL, 0.36 mol) in acetic anhydride (80 mL), trimethyl orthoformate (58 mL, 0.53 mol) was added, and the resultant mixture was heated at 100 °C for 2 d. The mixture was concentrated under reduced pressure, and the residue was used for next step without further purification.

### 2) Condensation with hydroxylamine<sup>2</sup>

To a solution of ethyl 3-methoxy-2-nitropropenoate (17.5 g, 100 mmol) in ethanol (175 mL), were added hydroxylamine hydrochloride (7.73 g, 120 mmol) and pyridine (20.2 mL, 250 mmol). The mixture was heated at 60 °C for 3 h. After cooling, pale yellow precipitates were formed and were collected to give pyridinium salt of nitroisoxazolone (14.8 g, 71 mmol, 71% yield).

### 3) *N*-Methylation with dimethyl sulfate<sup>3</sup>

Pyridinium salt of nitroisoxazolone (4.18 g, 20 mmol) was heated with freshly distilled dimethyl sulfate (2.3 mL, 24 mmol) without solvent at 65 °C for 3 h. The reaction mixture was cooled to room temperature, and water (100 mL) was added. Generated white precipitates were collected, and recrystallized from acetonitrile to afford isoxazolone **2** (2.26 g, 15.7 mmol, 79%).

## References

- 1 M. J. Kamlet, *J. Org. Chem.* **1959**, *24*, 714-715.
- 2 N. Nishiwaki, Y. Takada, Y. Inoue, Y. Tohda and M. Ariga, *J. Heterocycl. Chem.* **1995**, *32*, 473-475.
- 3 N. Nishiwaki M. Nakanishi, T. Hida, Y. Miwa, M. Tamura, K. Hori, Y. Tohda and M. Ariga, *J. Org. Chem.* **2001**, *66*, 7535-7538.

### 3-(*N*-Methylcarbamoyl)-5-phenyl-1,2,4-oxadiazole (3e)

$^1\text{H}$  NMR ( $\text{CDCl}_3$ )

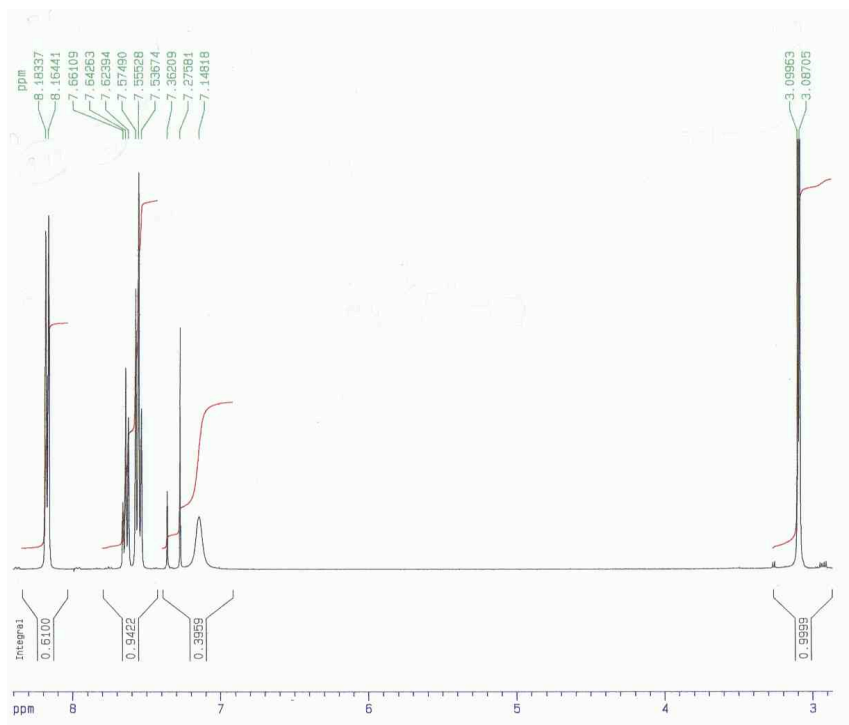

$^{13}\text{C}$  NMR ( $\text{CDCl}_3$ )

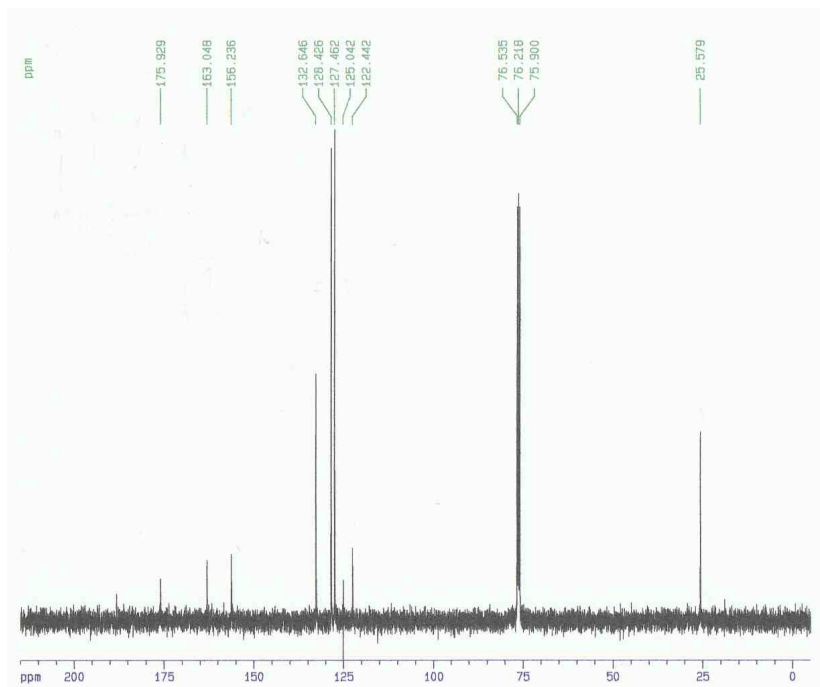

### 5-(4-Methoxyphenyl)-3-(*N*-methylcarbamoyl)-1,2,4-oxadiazole (3g)

$^1\text{H}$  NMR ( $\text{CDCl}_3$ )

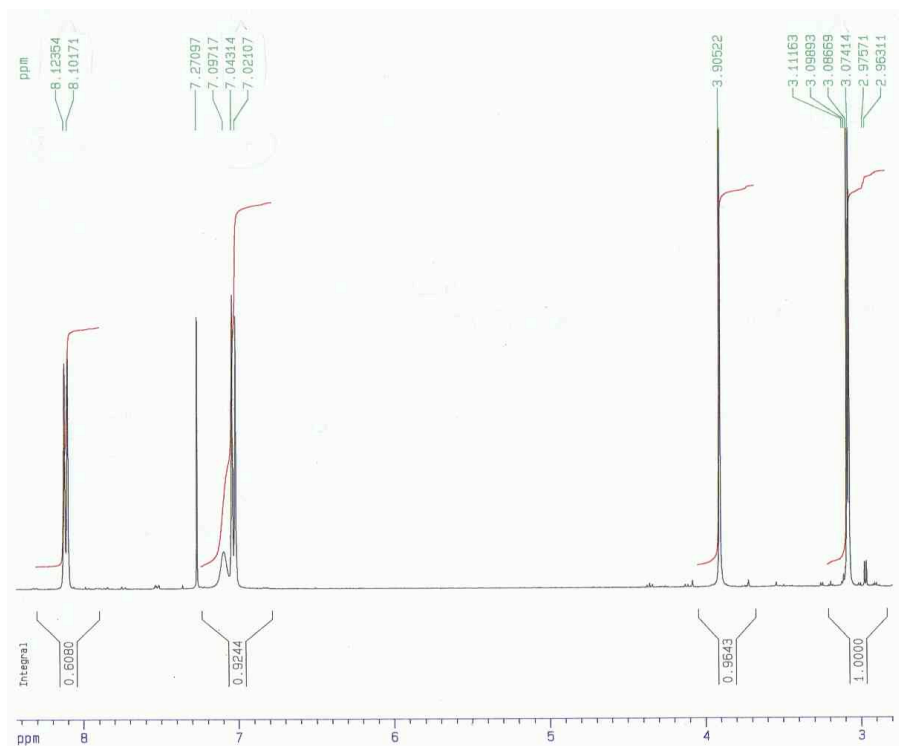

$^{13}\text{C}$  NMR ( $\text{CDCl}_3$ )

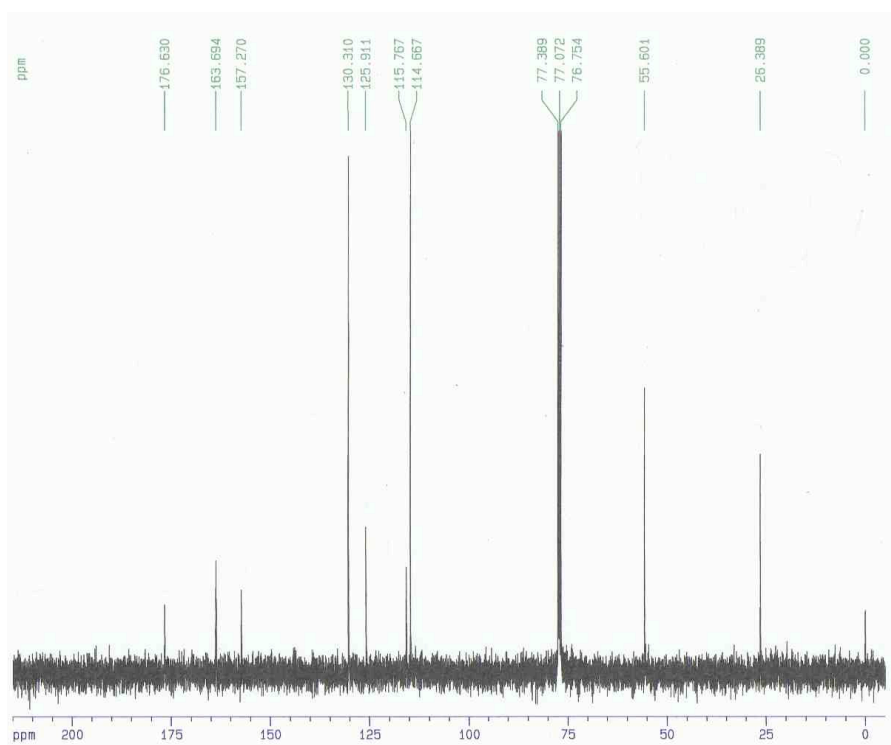

### 5-(4-Chlorophenyl)-3-(*N*-methylcarbamoyl)-1,2,4-oxadiazole (3i)

$^1\text{H}$  NMR ( $\text{CDCl}_3$ )

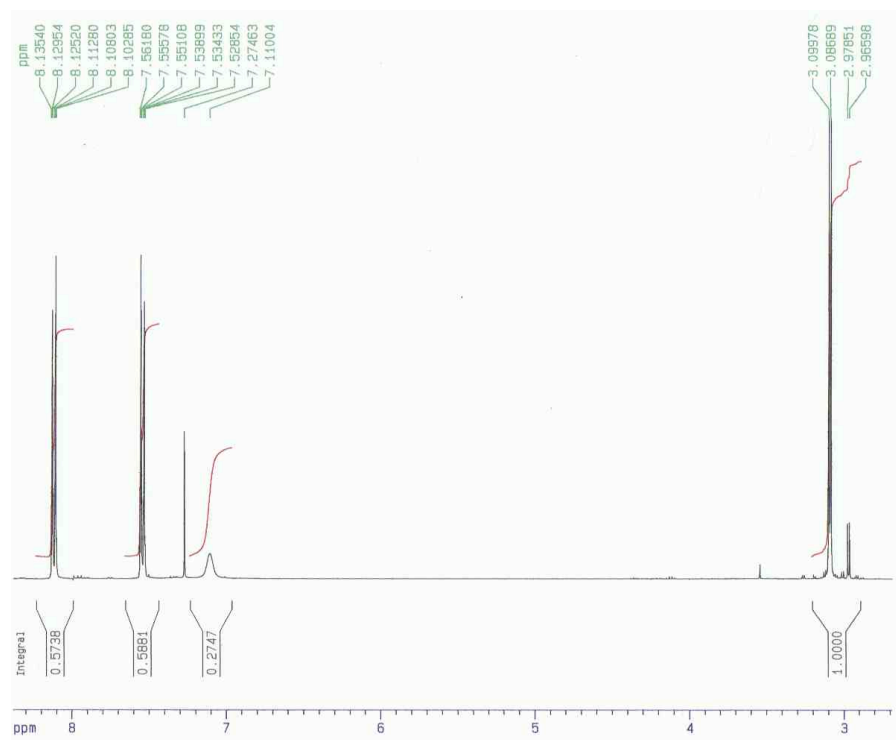

$^{13}\text{C}$  NMR ( $\text{CDCl}_3$ )

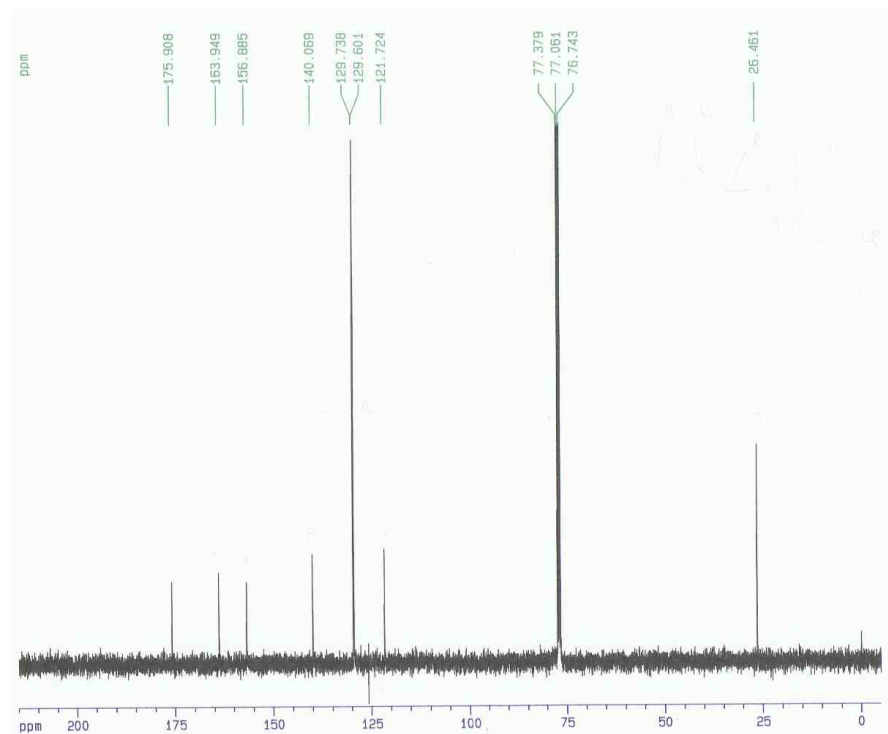

3-(*N*-Methylcarbamoyl)-5-(3-pyridyl)-1,2,4-oxadiazole (**3j**)

$^1\text{H}$  NMR ( $\text{CDCl}_3$ )

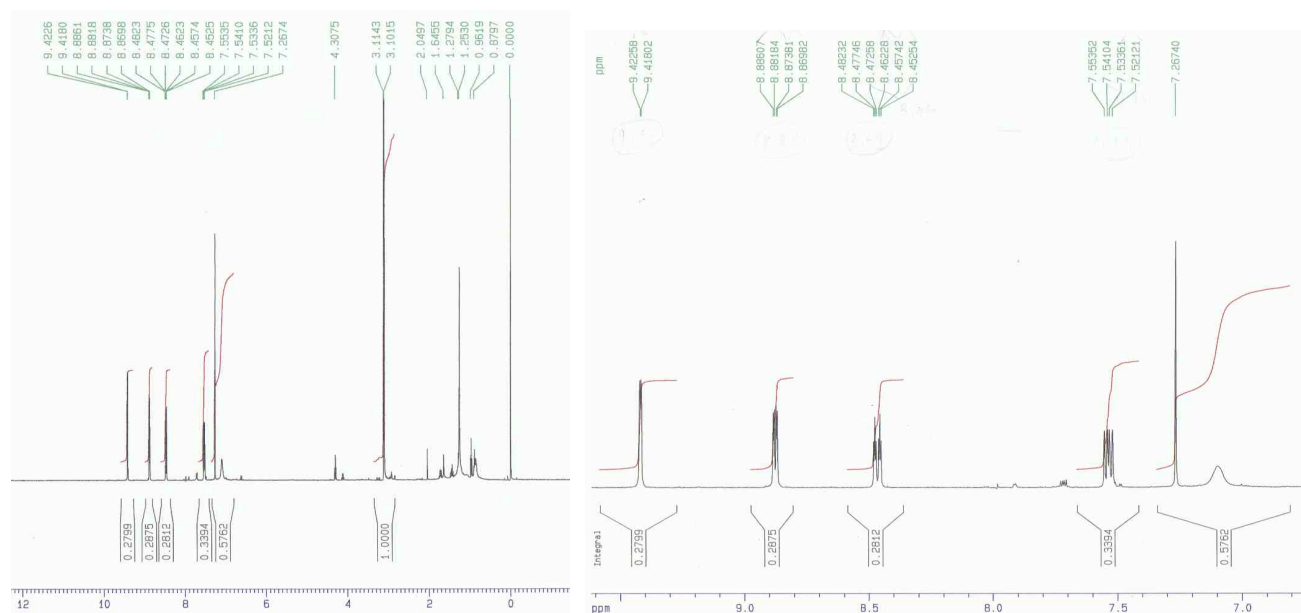

$^{13}\text{C}$  NMR ( $\text{CDCl}_3$ )

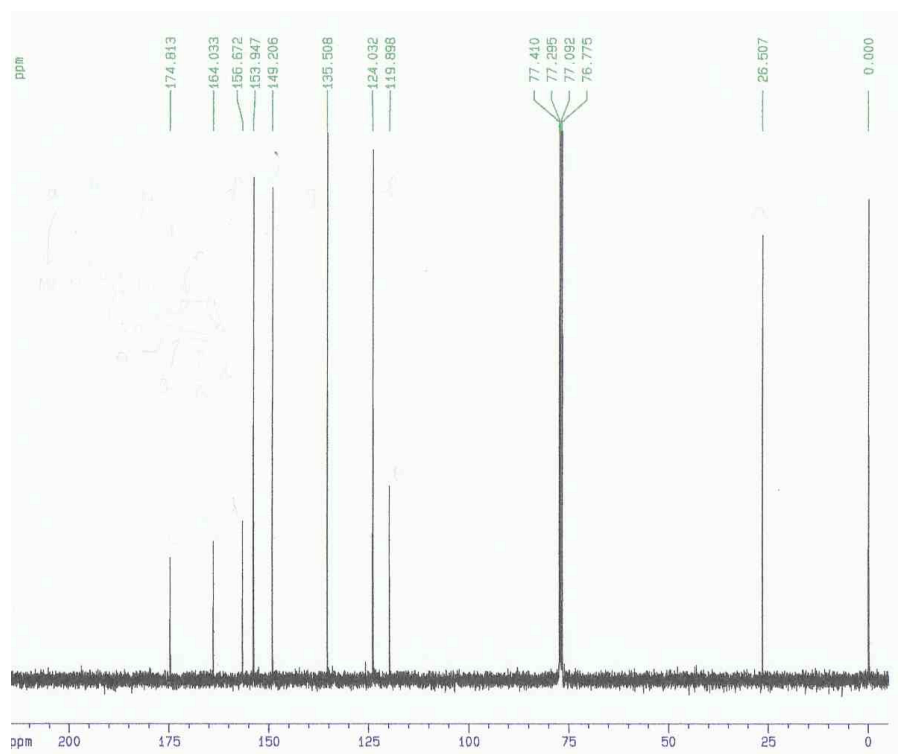

### 3-(*N*-Methylcarbamoyl)-5-(4-pyridyl)-1,2,4-oxadiazole (3k)

$^1\text{H}$  NMR ( $\text{CDCl}_3$ )

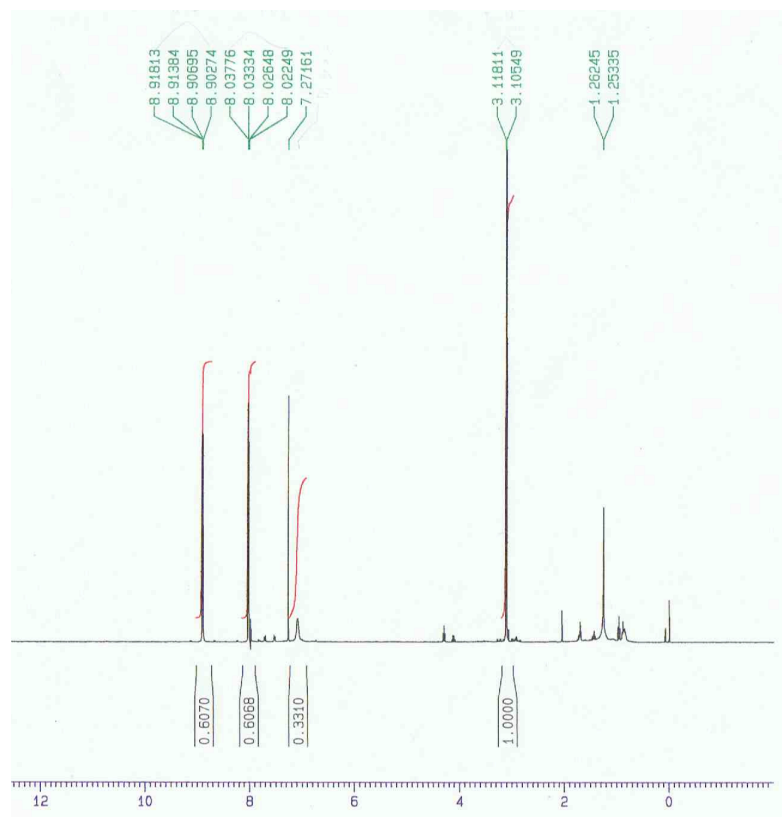

$^{13}\text{C}$  NMR ( $\text{CDCl}_3$ )

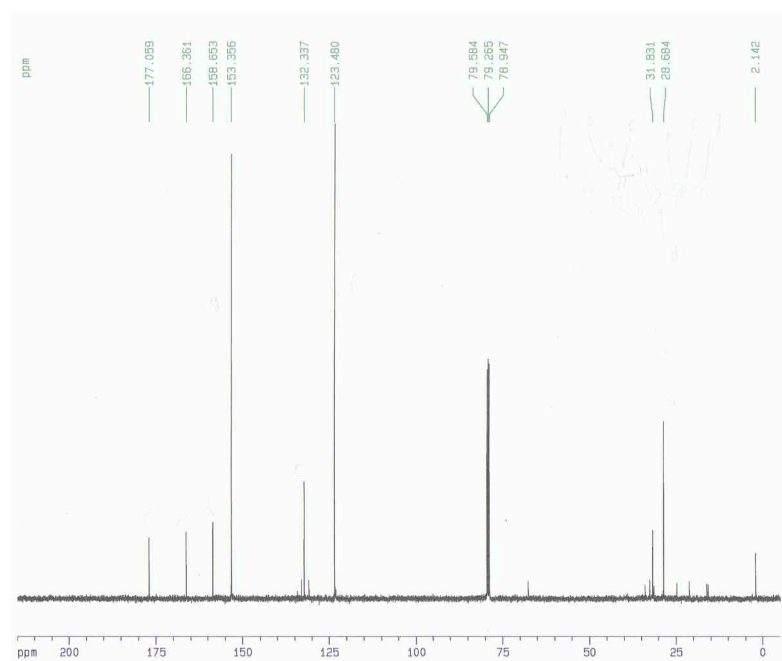

Supplement: c1ob05682d.pdf [file c1ob05682d.pdf]
